# Supplementary material
Source: Springer Nature journal article supplement (https://www.springermedizin.de/resource/supplementary/12879_2008_771_MOESM1_ESM.pdf/9449866)

x 10<sup>5</sup> cells

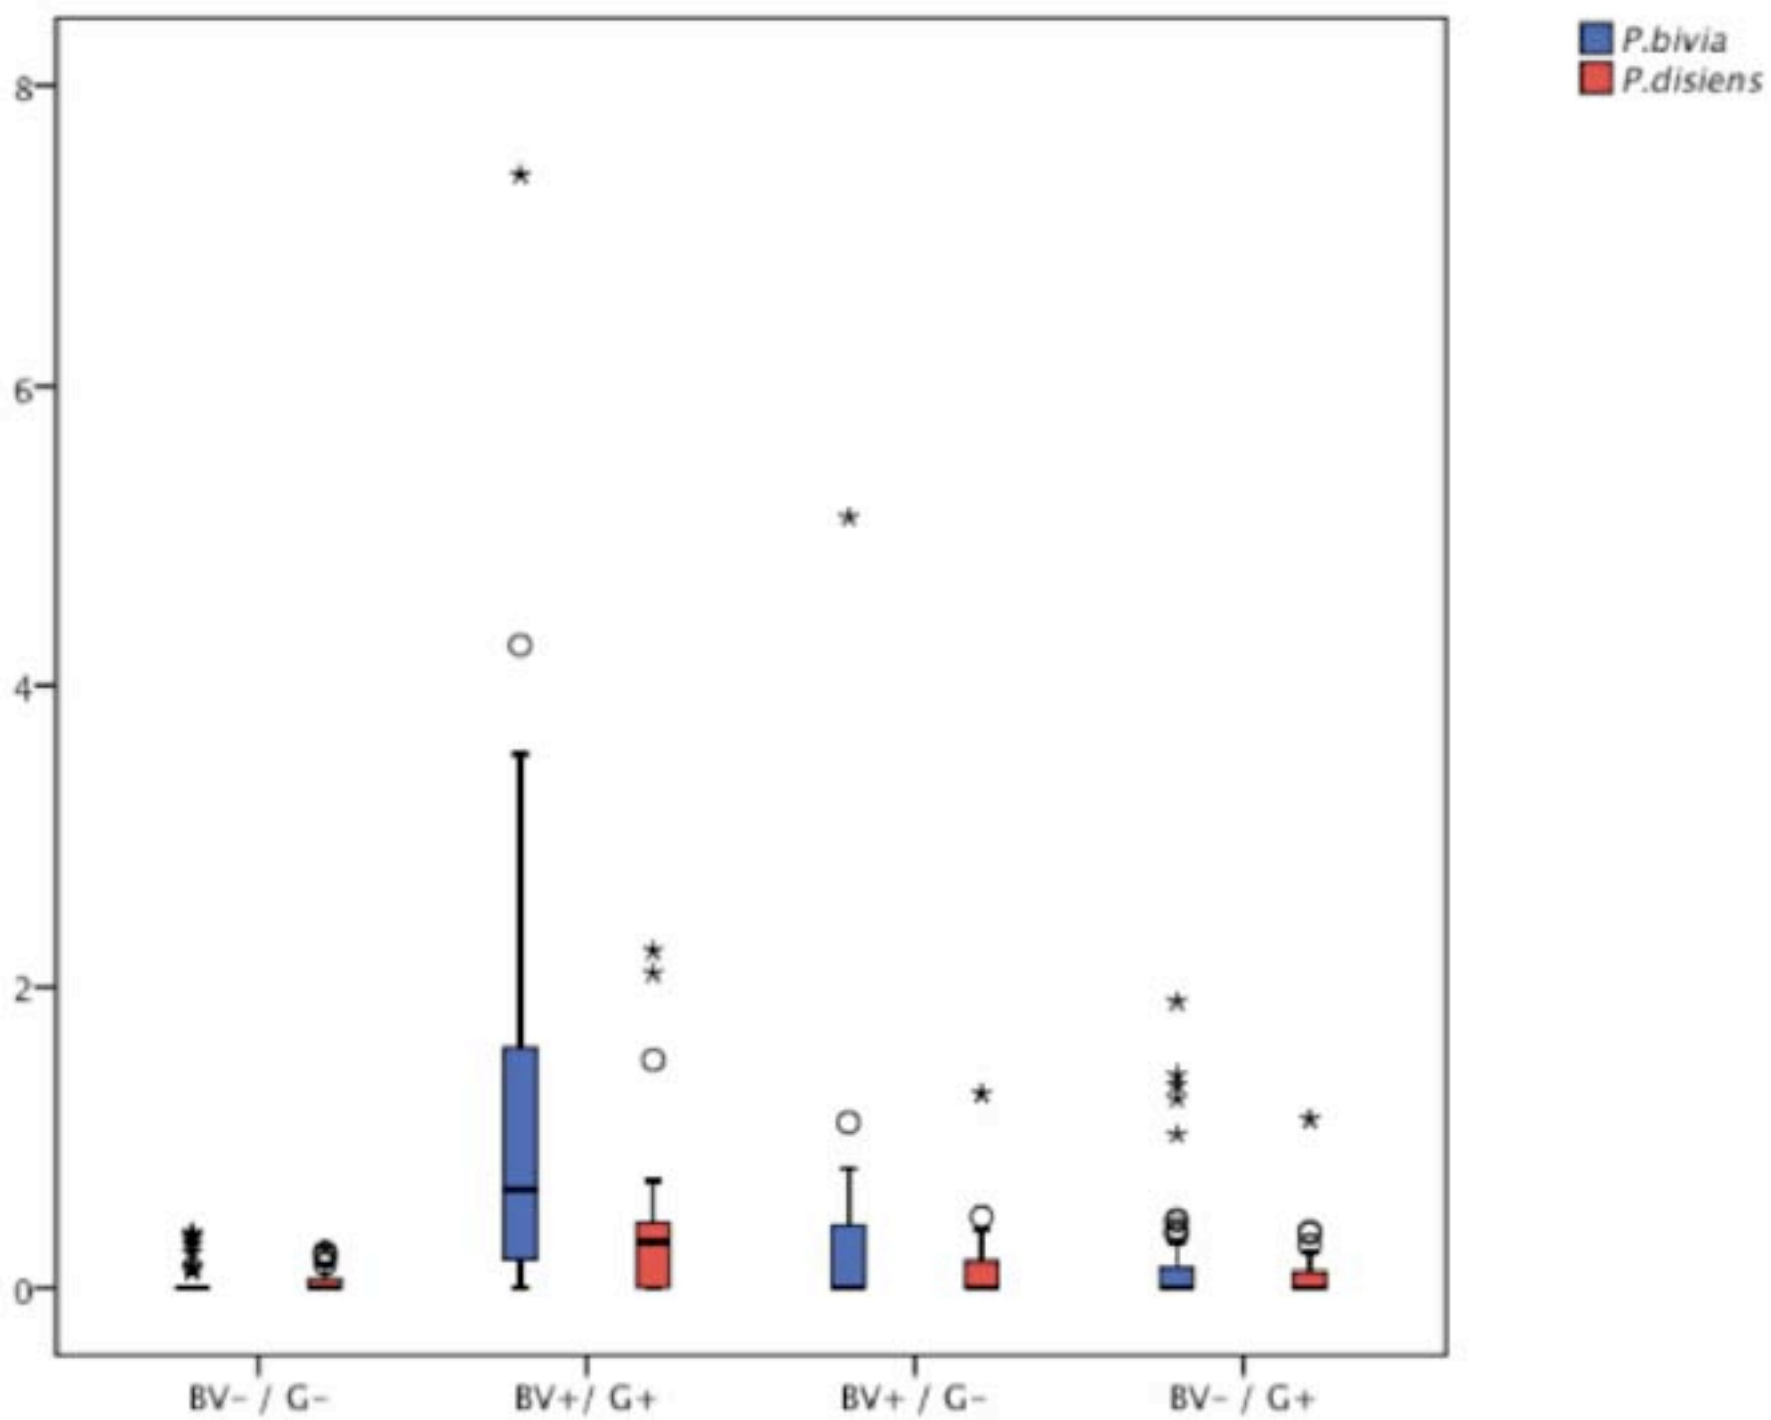

Supplement: MOESM1 [file 9449866]
